# Supplementary material for: A comparison of the strength of biodiversity effects across multiple functions
Source: Springer Nature journal article supplement (doi:10.1007/s00442-012-2589-0), 2013-02-05
Supplement: MOESM1 [file 442_2012_2589_MOESM1_ESM.doc]

**Table S1**: **full list of all variables used in the analysis.**

The variable name is given, along with the ecosystem process with which it is associated and its assignment to the explanatory variables listed in Table 1. Also shown are the number of measures taken of each of the variables and the number of plots on which the variable was measured (N). To explore the biogeochemical cycle effect further a separate analysis was conducted excluding variables that were not direct measures of carbon, nutrients or water, the variables excluded are indicated in the column "Biogeochemical Cycle Direct Measures" as "excluded". Abbreviations are given for elements: carbon (C) nitrogen (N) and phosphorus (P).

| Number of times measured | Variable | Ecosystem Process (Fig 2) | N | Static Dynamic | Trophic Level | Biogeochemical Cycle | Biogeochemical Cycle Direct Measures | Diversity/  Others | Abiotic/ Biotic | Compartment |
| --- | --- | --- | --- | --- | --- | --- | --- | --- | --- | --- |
| 8 | Average vegetation height | Target Production | 81 | static | producer | carbon | excluded | Material | biotic | above |
| 13 | Biomass above target | Target Production | 81 | static | producer | carbon | excluded | material | biotic | above |
| 13 | Cover target | Target Production | 82 | static | producer | carbon | excluded | material | biotic | above |
| 10 | Leaf area index | Target Production | 81 | static | producer | carbon | excluded | material | biotic | above |
| 5 | Mean of maximum height transect flowers | Target Production | 75 | static | producer | carbon | excluded | material | biotic | above |
| 2 | Plant modules target per m² | Target Production | 82 | static | producer | carbon | excluded | material | biotic | above |
| 13 | Prop cover vegetation | Target Production | 65 | static | producer | carbon | excluded | material | biotic | above |
| 12 | Biomass above dead | Dead Biomass | 82 | static | producer | carbon | excluded | material | biotic | above |
| 11 | Plant C% | Plant C% | 79 | static | producer | carbon | carbon | material | biotic | above |
| 6 | Number of propagules target per m² | Target Seed Production | 82 | static | producer | carbon | excluded | material | biotic | below |
| 2 | Fine root C%† | Root C% | 75 | dynamic | producer | carbon | carbon | material | biotic | below |
| 2 | Fine root production | Root Production | 79 | dynamic | producer | carbon | excluded | material | biotic | below |
| 2 | Fine root stock | Root Production | 80 | static | producer | carbon | excluded | material | biotic | below |
| 2 | Large root production | Root Production | 79 | dynamic | producer | carbon | excluded | material | biotic | below |
| 2 | Large root stock | Root Production | 80 | static | producer | carbon | excluded | material | biotic | below |
| 2 | Mean diameter of roots | Root Production | 80 | dynamic | producer | carbon | excluded | material | biotic | below |
| 1 | Mean diameter of standing roots | Root Production | 81 | static | producer | carbon | excluded | material | biotic | below |
| 2 | Root length increment | Root Production | 80 | dynamic | producer | carbon | excluded | material | biotic | below |
| 1 | Mean herbivory *Plantago lanceolata* phytometers | Herbivore Damage | 82 | static | herbivore | carbon | excluded | material | biotic | above |
| 2 | Mean herbivory *Rumex acetosa* phytometers | Herbivore Damage | 82 | static | herbivore | carbon | excluded | material | biotic | above |
| 1 | Mean Herbivory *Trifolium pratense* phytometers | Herbivore Damage | 81 | static | herbivore | carbon | excluded | material | biotic | above |
| 4 | Mean Herbivory along Transect (%) | Herbivore Damage | 80 | static | herbivore | carbon | excluded | material | biotic | above |
| 1 | Mean Mollusc Herbivory *Vicia faba* phytometers | Herbivore Damage | 80 | static | herbivore | carbon | excluded | material | biotic | above |
| 6 | Flower visitor frequency | Pollinator Abundance | 76 | static | herbivore | carbon | excluded | material | biotic | above |
| 1 | Hymenoptera broad cells per plot | Pollinator Abundance | 82 | static | herbivore | carbon | excluded | material | biotic | above |
| 1 | Hymenoptera dead broad cells | Pollinator Abundance | 76 | static | herbivore | carbon | excluded | material | biotic | above |
| 1 | Hymenoptera nests per plot | Pollinator Abundance | 82 | static | herbivore | carbon | excluded | material | biotic | above |
| 1 | Number of Aphidina | Above Herbivore Abundance | 82 | static | herbivore | carbon | excluded | material | biotic | above |
| 1 | Number of Saltatoria | Above Herbivore Abundance | 50 | static | herbivore | carbon | excluded | material | biotic | above |
| 2 | Number of Cicadina | Above Herbivore Abundance | 50 | static | herbivore | carbon | excluded | material | biotic | above |
| 2 | Number of Heteroptera | Above Herbivore Abundance | 50 | static | herbivore | carbon | excluded | material | biotic | above |
| 1 | Number of phytophagous Coleoptera | Above Herbivore Abundance | 50 | static | herbivore | carbon | excluded | material | biotic | above |
| 1 | Number of phytophagous Diptera | Above Herbivore Abundance | 50 | static | herbivore | carbon | excluded | material | biotic | above |
| 1 | Number of phytophagous Diptera (leaf chewers) | Above Herbivore Abundance | 50 | static | herbivore | carbon | excluded | material | biotic | above |
| 1 | Number of phytophagous Diptera (miners) | Above Herbivore Abundance | 50 | static | herbivore | carbon | excluded | material | biotic | above |
| 1 | Number of phytophagous Heteroptera | Above Herbivore Abundance | 50 | static | herbivore | carbon | excluded | material | biotic | above |
| 1 | Number of phytophagous Hymenoptera | Above Herbivore Abundance | 50 | static | herbivore | carbon | excluded | material | biotic | above |
| 1 | Number of Auchenorrhyncha | Above Herbivore Abundance | 82 | static | herbivore | carbon | excluded | material | biotic | above |
| 2 | Number of Diptera | Above Herbivore Abundance | 82 | static | herbivore | carbon | excluded | material | biotic | above |
| 3 | Number of Gastropoda | Above Herbivore Abundance | 82 | static | herbivore | carbon | excluded | material | biotic | above |
| 2 | Number of phytophagous Coleoptera | Above Herbivore Abundance | 82 | static | herbivore | carbon | excluded | material | biotic | above |
| 2 | Number of sucking herbivores | Above Herbivore Abundance | 82 | static | herbivore | carbon | excluded | material | biotic | above |
| 1 | Number of Thysanoptera | Above Herbivore Abundance | 82 | static | herbivore | carbon | excluded | material | biotic | above |
| 2 | Number of vole burrowing holes | Above Herbivore Abundance | 82 | static | herbivore | carbon | excluded | material | biotic | above |
| 3 | Pathogen infection | Pathogen Infection | 81 | static | herbivore | carbon | excluded | material | biotic | above |
| 2 | Species richness Cicadina | Above Herbivore Diversity | 50 | static | herbivore | carbon | excluded | information | biotic | above |
| 1 | Species richness Heteroptera | Above Herbivore Diversity | 50 | static | herbivore | carbon | excluded | information | biotic | above |
| 1 | Species richness phytophagous Coleoptera | Above Herbivore Diversity | 50 | static | herbivore | carbon | excluded | information | biotic | above |
| 2 | Species richness phytophagous Diptera | Above Herbivore Diversity | 50 | static | herbivore | carbon | excluded | information | biotic | above |
| 1 | Species richness phytophagous Heteroptera | Above Herbivore Diversity | 50 | static | herbivore | carbon | excluded | information | biotic | above |
| 1 | Species richness phytophagous Hymenoptera | Above Herbivore Diversity | 50 | static | herbivore | carbon | excluded | information | biotic | above |
| 1 | Species richness Saltatoria | Above Herbivore Diversity | 50 | static | herbivore | carbon | excluded | information | biotic | above |
| 1 | Hymenoptera species per plot | Pollinator Diversity | 82 | static | herbivore | carbon | excluded | information | biotic | above |
| 1 | Hymenoptera species per trap | Pollinator Diversity | 82 | static | herbivore | carbon | excluded | information | biotic | above |
| 6 | Species number of flower visitors | Pollinator Diversity | 76 | static | herbivore | carbon | excluded | information | biotic | above |
| 3 | Pathogen groups | No. Pathogen Groups | 81 | static | herbivore | carbon | excluded | information | biotic | above |
| 2 | Number of phytophagous insect larvae | Below Herbivore Abundance | 82 | static | herbivore | carbon | excluded | material | biotic | below |
| 1 | Number of plant feeding Nematodes | Below Herbivore Abundance | 73 | static | herbivore | carbon | excluded | material | biotic | below |
| 3 | Number of Diplopoda | Above Decomposer Abundance | 50 | static | decomposer | carbon | excluded | material | biotic | above |
| 2 | Number of saprophagous Diptera | Above Decomposer Abundance | 50 | static | decomposer | carbon | excluded | material | biotic | above |
| 1 | Species richness Diplopoda | Above Decomposer Diversity | 50 | static | decomposer | carbon | excluded | information | biotic | above |
| 2 | Species richness saprophagous Diptera | Above Decomposer Diversity | 50 | static | decomposer | carbon | excluded | information | biotic | above |
| 4 | Microbial biomass* (substrate induced respiration) | Below Decomposer Abundance | 82 | static | decomposer | carbon | Carbon | material | biotic | below |
| 2 | Number of Collembola | Below Decomposer Abundance | 82 | static | decomposer | carbon | excluded | material | biotic | below |
| 1 | Number of Enchytraeidae | Below Decomposer Abundance | 82 | static | decomposer | carbon | excluded | material | biotic | below |
| 4 | Number of endogeic earthworms | Below Decomposer Abundance | 82 | static | decomposer | carbon | excluded | material | biotic | below |
| 3 | Number of Isopoda | Below Decomposer Abundance | 82 | static | decomposer | carbon | excluded | material | biotic | below |
| 2 | Number of *Lumbricus terrestris* | Below Decomposer Abundance | 82 | static | decomposer | carbon | excluded | material | biotic | below |
| 2 | Number of Oribatid mites | Below Decomposer Abundance | 82 | static | decomposer | carbon | excluded | material | biotic | below |
| 4 | Soil basal respiration | Below Decomposer Abundance | 82 | static | decomposer | carbon | carbon | material | biotic | below |
| 1 | Microbial C% | Microbial C% | 77 | static | ecosystem | carbon | carbon | material | biotic | below |
| 1 | Number of Arachnida | Above Carnivore Abundance | 50 | static | carnivores | carbon | excluded | material | biotic | above |
| 1 | Hymenoptera parasitited broad cells | Above Carnivore Abundance | 76 | static | carnivores | carbon | excluded | material | biotic | above |
| 1 | Number of Arachnida Vegetation | Above Carnivore Abundance | 50 | static | carnivores | carbon | excluded | material | biotic | above |
| 1 | Number of Arachnida ground | Above Carnivore Abundance | 50 | static | carnivores | carbon | excluded | material | biotic | above |
| 2 | Number of Carabidae | Above Carnivore Abundance | 50 | static | carnivores | carbon | excluded | material | biotic | above |
| 5 | Number of Chilopoda | Above Carnivore Abundance | 50 | static | carnivores | carbon | excluded | material | biotic | above |
| 2 | Number of parasitic Hymenoptera | Above Carnivore Abundance | 50 | static | carnivores | carbon | excluded | material | biotic | above |
| 1 | Number of parasitic Diptera | Above Carnivore Abundance | 50 | static | carnivores | carbon | excluded | material | biotic | above |
| 1 | Number of Predatory Heteroptera | Above Carnivore Abundance | 50 | static | carnivores | carbon | excluded | material | biotic | above |
| 1 | Number of Predatory Hymenoptera | Above Carnivore Abundance | 50 | static | carnivores | carbon | excluded | material | biotic | above |
| 1 | Number of predatory Diptera | Above Carnivore Abundance | 50 | static | carnivores | carbon | excluded | material | biotic | above |
| 2 | Number of predatory Coleoptera | Above Carnivore Abundance | 82 | static | carnivores | carbon | excluded | material | biotic | above |
| 3 | Number of Araneae | Above Carnivore Abundance | 82 | static | carnivores | carbon | excluded | material | biotic | above |
| 2 | Number of Staphylinidae | Above Carnivore Abundance | 50 | static | carnivores | carbon | excluded | material | biotic | above |
| 1 | Hymenoptera species number parasites | Above Carnivore Diversity | 76 | static | carnivores | carbon | excluded | information | biotic | above |
| 1 | Species richness Arachnida Vegetation | Above Carnivore Diversity | 50 | static | carnivores | carbon | excluded | information | biotic | above |
| 2 | Species richness Arachnida ground | Above Carnivore Diversity | 50 | static | carnivores | carbon | excluded | information | biotic | above |
| 2 | Species richness Carabidae | Above Carnivore Diversity | 50 | static | carnivores | carbon | excluded | information | biotic | above |
| 1 | Species richness Chilopoda | Above Carnivore Diversity | 50 | static | carnivores | carbon | excluded | information | biotic | above |
| 2 | Species richness Staphylinidae | Above Carnivore Diversity | 50 | static | carnivores | carbon | excluded | information | biotic | above |
| 1 | Species richness zoophagous Diptera | Above Carnivore Diversity | 50 | static | carnivores | carbon | excluded | information | biotic | above |
| 1 | Species richness zoophagous heteroptera | Above Carnivore Diversity | 50 | static | carnivores | carbon | excluded | information | biotic | above |
| 2 | Species richness zoophagous Hymenoptera | Above Carnivore Diversity | 50 | static | carnivores | carbon | excluded | information | biotic | above |
| 1 | Number of bacteria feeding nematodes | Below Carnivore Abundance | 73 | static | carnivores | carbon | excluded | material | biotic | below |
| 2 | Number of Gamasida | Below Carnivore Abundance | 82 | static | carnivores | carbon | excluded | material | biotic | below |
| 1 | Number of nematode feeding nematodes | Below Carnivore Abundance | 73 | static | carnivores | carbon | excluded | material | biotic | below |
| 1 | Number of predatory nematodes | Below Carnivore Abundance | 73 | static | carnivores | carbon | excluded | material | biotic | below |
| 2 | Number of predatory Coleoptera larvae | Below Carnivore Abundance | 82 | static | carnivores | carbon | excluded | material | biotic | below |
| 6 | Soil CO2 emission rate | Soil CO2 emission | 79 | dynamic | ecosystem | carbon | carbon | material | abiotic | below |
| 6 | δ13C soil† | δ13C soil | 82 | dynamic | ecosystem | carbon | carbon | material | abiotic | below |
| 6 | Soil methane oxidation | Soil methane oxidation | 79 | dynamic | ecosystem | carbon | carbon | material | abiotic | below |
| 12 | Storage soil C inorganic%† | Storage soil C inorganic% | 82 | dynamic | ecosystem | carbon | carbon | material | abiotic | below |
| 12 | Storage soil C organic%† | Storage soil C organic% | 82 | dynamic | ecosystem | carbon | carbon | material | abiotic | below |
| 4 | Plant δ15N | Plant δ15N | 81 | static | producer | nutrient | nutrient | material | biotic | above |
| 11 | Plant N% | Plant N% | 79 | static | producer | nutrient | nutrient | material | biotic | above |
| 16 | Ammonium soil% | Ammonium soil% | 82 | static | ecosystem | nutrient | nutrient | material | abiotic | below |
| 2 | Denitrifying enzyme activity | Microbial N | 80 | dynamic | ecosystem | nutrient | nutrient | material | biotic | below |
| 1 | Microbial N% | Microbial N | 77 | static | ecosystem | nutrient | nutrient | material | biotic | below |
| 2 | Nitrifying enzyme activity | Microbial N | 79 | dynamic | ecosystem | nutrient | nutrient | material | biotic | below |
| 6 | Soil δ15N† | Soil δ15N | 82 | dynamic | ecosystem | nutrient | nutrient | material | abiotic | below |
| 6 | Soil N2O emission | Soil N2O emission | 79 | dynamic | ecosystem | nutrient | nutrient | material | abiotic | below |
| 2 | Fine root N%† | Root N% | 75 | dynamic | producer | nutrient | nutrient | material | biotic | below |
| 12 | Storage soil N%† | Storage soil N% | 82 | dynamic | ecosystem | nutrient | nutrient | material | abiotic | below |
| 19 | Soil nitrate% | Soil Nitrate% | 82 | static | ecosystem | nutrient | nutrient | material | abiotic | below |
| 2 | Soil P% | Soil P% | 82 | static | ecosystem | nutrient | nutrient | material | abiotic | below |
| 1 | Gravimetric water content % | Soil Water | 82 | static | ecosystem | water | water | material | abiotic | below |
| 37 | Soil water content | Soil Water | 82 | static | ecosystem | water | water | material | abiotic | below |
| 3 | Plant δ13C‡ | Plant δ13C | 82 | static | producer | carbon | excluded | material | biotic | above |

* Microbial biomass was measured as substrate induced respiration and is therefore a direct measure of carbon (C02 production). Substrate induce respiration is commonly used as a measure of microbial carbon and has been shown to be highly correlated with microbial carbon content analysed using other methods (Beck et al. 1997).

‡ Plant δ13C values were analysed as carbon variables because they have been shown to be associated with a light adapting strategy (Roscher et al. 2011). We excluded them from the analysis of variables directly associated with the different biogeochemical cycles because Plant δ13C variables are also associated with water use efficiency (Farquhar et al. 1982) and therefore are associated with both the water and carbon cycles. Repeating the full analysis with Plant δ13C assigned to the water cycle does not alter the significance of the biogeochemical cycle term (p=0.01 on addition to the null model and p=0.03 on deletion from the full model; see methods).

† These variables were calculated as differences between pairs of years and are therefore considered dynamic.

**References**

Beck T, Joergensen RG, Kandeler E, Makeschin F, Nuss E, Oberholzer HR, Scheu S (1997) An inter-laboratory comparison of ten different ways of measuring soil microbial biomass C. Soil Biol. Biochem. 29:1023–1032.

Farquhar GD, O'Leary MH, Berry JA (1982) On the Relationship Between Carbon Isotope Discrimination and the Intercellular Carbon Dioxide Concentration in Leaves. Australian Journal of Plant Physiology 9:121–137.

Roscher C, Kutsch WL, Schulze E (2011) Light and nitrogen competition limit *Lolium perenne* in experimental grasslands of increasing plant diversity. Plant Biology 13:134–144.
